# Supplementary material for: Magnetic and radio-labeled bio-hybrid scaffolds to promote and track in vivo the progress of bone regeneration
Source: Royal Society of Chemistry journal article supplement (doi:10.1039/d1bm00858g), 2021-01-01
Supplement: d1bm00858g3.pdf [file d1bm00858g3.pdf]

[The rest of the page is blank or contains extremely faint, illegible text.]
