# Supplementary material for: Magnetic and radio-labeled bio-hybrid scaffolds to promote and track in vivo the progress of bone regeneration
Source: Royal Society of Chemistry journal article supplement (doi:10.1039/d1bm00858g), 2021-01-01
Supplement: d1bm00858g6.pdf [file d1bm00858g6.pdf]

**A**

| Samples     | Ca/P (mol) | Fe/Ca (mol) | Fe/hybrid composite wt% | Functionalization yield % (real/theoretical%) | Organic : inorganic (measured by TGA) |
|-------------|------------|-------------|-------------------------|-----------------------------------------------|---------------------------------------|
| MNPs_3%     | 1,460      | 0,071       | 1,621 %                 | 54 %                                          | 46:54                                 |
| MNPs_1.5%   | 1,420      | 0,042       | 1,029 %                 | 68.6 %                                        | 44:56                                 |
| MNPs_0.75%  | 1,399      | 0,025       | 0,550 %                 | 73.3 %                                        | 52:48                                 |
| MNPs_0.37%  | 1,439      | 0,013       | 0,276 %                 | 74.59 %                                       | 48:52                                 |
| MNPs_0.075% | 1,394      | 0,003       | 0,072 %                 | 96 %                                          | 43:57                                 |

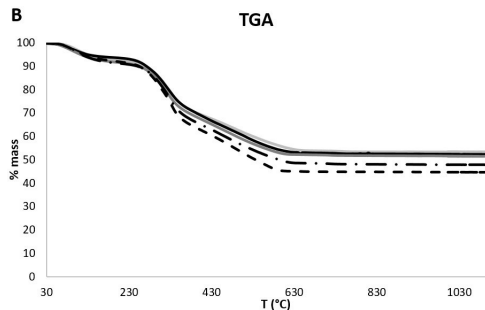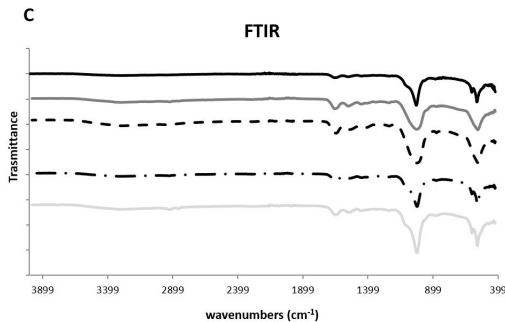

— MNPs\_3% — MNPs\_1.5% - - MNPs\_0.75% - · MNPs\_0.37% — MNPs\_0.075%
