# Supplementary material for: Magnetic and radio-labeled bio-hybrid scaffolds to promote and track in vivo the progress of bone regeneration
Source: Royal Society of Chemistry journal article supplement (doi:10.1039/d1bm00858g), 2021-01-01

Electronic Supplementary Material (ESI) for Biomaterials Science.  
This journal is © The Royal Society of Chemistry 2021

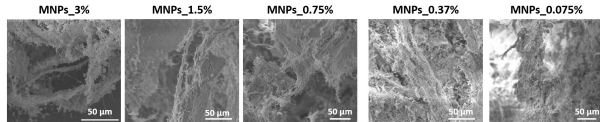

Supplement: d1bm00858g7.pdf [file d1bm00858g7.pdf]
