# Supplementary material for: Magnetic and radio-labeled bio-hybrid scaffolds to promote and track in vivo the progress of bone regeneration
Source: Royal Society of Chemistry journal article supplement (doi:10.1039/d1bm00858g), 2021-01-01
Supplement: d1bm00858g10.pdf [file d1bm00858g10.pdf]

## Supporting information

### Magnetic and radio-labeled bio-hybrid scaffolds to promote and track in vivo the progress of bone regeneration

Received 00th January 20xx,  
Accepted 00th January 20xx

DOI: 10.1039/x0xx00000x

Elisabetta Campodoni<sup>a\*</sup>, Marisela Velez<sup>b\*</sup>, Eirini Fragogeorgi<sup>c,d</sup>, Irene Morales<sup>e,f</sup>, Patricia de la Presa<sup>e,f</sup>, Dimitri Stanicki<sup>g</sup>, Samuele M. Dozio<sup>a,h</sup>, Stavros Xanthopoulos<sup>c</sup>, Penelope Bouziotis<sup>c</sup>, Eleftheria Dermisiadou<sup>d</sup>, Maritina Rouchota<sup>d</sup>, George Loudos<sup>c,d</sup>, Pilar Marín<sup>e,f</sup>, Sophie Laurent<sup>g,i</sup>, Sébastien Boutry<sup>g,i</sup>, Silvia Panseri<sup>a</sup>, Monica Montesi<sup>a</sup>, Anna Tampieri<sup>a</sup>, Monica Sandri<sup>a\*</sup>

#### LIST OF ACRONYMS:

| ACRONYM                    | DESCRIPTION                                                  |
|----------------------------|--------------------------------------------------------------|
| SPECT                      | Single Photon Emission Computed Tomography                   |
| CT                         | Computed tomography scan                                     |
| MRI                        | Magnetic Resonance Imaging                                   |
| [ <sup>99m</sup> Tc]Tc-MDP | Technetium (99mTc) medronic acid, a commercial radiotracer   |
| TEPSA                      | 3-(Triethoxysilyl)propylsuccinic anhydride                   |
| SPIONs                     | Superparamagnetic iron oxide nanoparticles                   |
| TEPSA-SPIONs               | Superparamagnetic iron oxide nanoparticles coated with TEPSA |

|            |                                                                                                                         |
|------------|-------------------------------------------------------------------------------------------------------------------------|
| nMNPs      | Naked SPIONs                                                                                                            |
| MNPs       | TEPSA-SPIONs activated by EDC/sulfo-NHS coupling                                                                        |
| HyS        | Hybrid scaffold obtained thorough the biomineralization process in which hydroxyapatite is nucleated on collagen fibers |
| (nMNPs)HyS | Hybrid scaffold functionalized with naked SPIONs before biomineralization process                                       |
| (MNPs)HyS  | Hybrid scaffold functionalized with activated TEPSA-SPIONs before biomineralization process                             |
| Hy(nMNPs)S | Hybrid scaffold functionalized with naked SPIONs during biomineralization process                                       |
| Hy(MNPs)S  | Hybrid scaffold functionalized with activated TEPSA-SPIONs during biomineralization process                             |
| HyS(nMNPs) | Hybrid scaffold functionalized with naked SPIONs after biomineralization process                                        |
| HyS(MNPs)  | Hybrid scaffold functionalized with activated TEPSA-SPIONs after biomineralization process                              |

<sup>a</sup> Institute of Science and Technology for Ceramics-National Research Council (CNR), Faenza, Italy.

<sup>b</sup> Instituto de Catálisis y Petroleoquímica (CSIC), Madrid, Spain.

<sup>c</sup> National Center for Scientific Research (NCSR) "Demokritos", Institute of Nuclear & Radiological Sciences & Technology, Energy & Safety, Ag. Paraskevi-Athens, Greece

<sup>d</sup> BIOEMTECH, Lefkippos Attica Technology Park, NCSR "Demokritos", Ag. Paraskevi-Athens, Greece

<sup>e</sup> Instituto de Magnetismo Aplicado (UCM-ADIF-CSIC), A6 22, Las Rozas, 28260, Spain

<sup>f</sup> Dpto Física de Materiales, UCM, Ciudad Universitaria, Madrid, 28040, Spain

<sup>g</sup> University of Mons, General, Organic and Biomedical Chemistry, NMR and Molecular Imaging Lab, 7000 Mons, Belgium

<sup>h</sup> Institute of Solid-State Electronics, Vienna University of Technology, Vienna, Austria

<sup>i</sup> Center for Microscopy and Molecular Imaging, 6041 Charleroi, Belgium

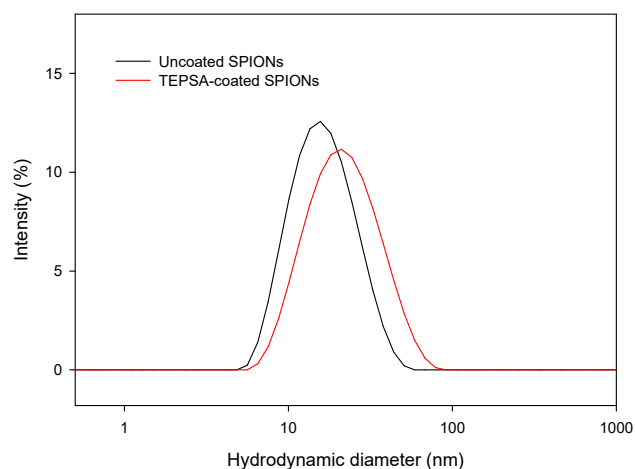

**Figure S1.** Size distribution in intensity as measured by photon correlation spectroscopy (PCS) of uncoated (black line) and TEPSA-coated NPs (red line).

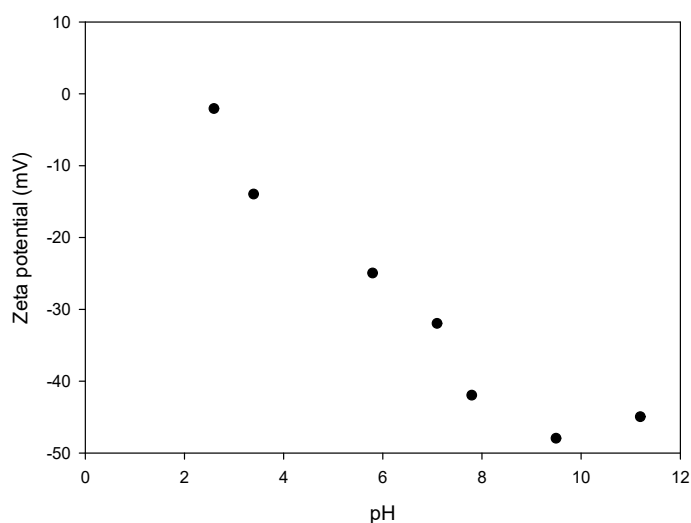

**Figure S2.**  $\zeta$ -Potential measurements vs pH of TEPSA-coated nanoparticles.

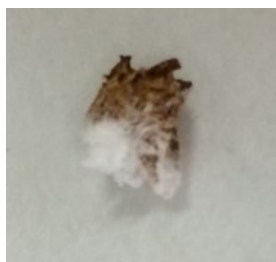

**Figure S3.** Image representing the third preparation condition in which the hybrid composite was previously prepared and subsequently soaked in a solution containing the naked nanoparticles (nMNPs). In this case the resulting scaffold was visibly inhomogeneous due to precipitation of nMNPs during drying.

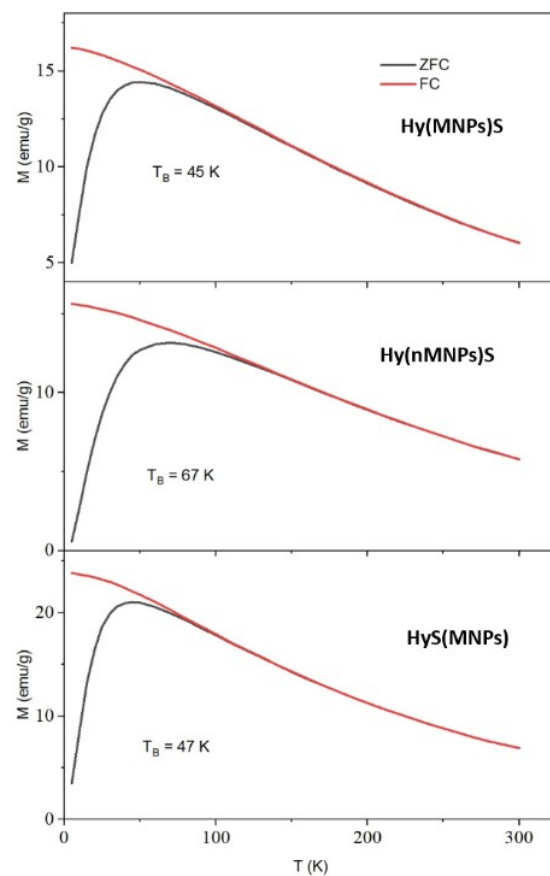

**Figure S4.** ZFC-FC curves of the samples at 100 Oe.

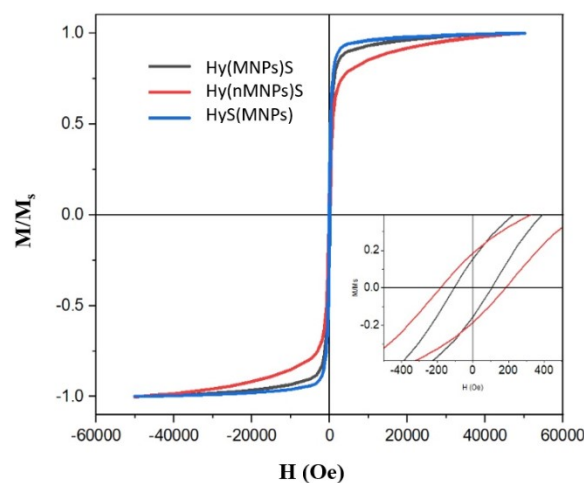

**Figure S5.** Normalized hysteresis loops at 5 K of the three samples. The inset shows a zoom at low field of samples Hy(MNPs)S and Hy(nMNPs)S

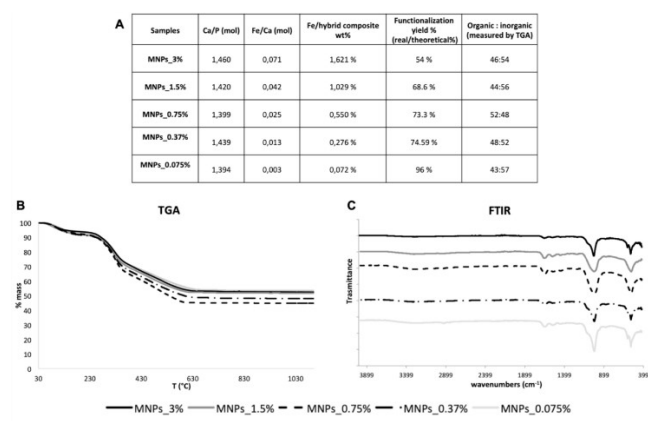

**Figure S6.** A) Chemical composition of the MNPs\_3%; MNPs\_1.5%; MNPs\_0.75%; MNPs\_0.37%; MNPs\_0.075% obtained from ICP analysis; B) Thermal decomposition profile (TG) of the MNPs\_3%; MNPs\_1.5%; MNPs\_0.75%; MNPs\_0.37%; MNPs\_0.075%, the weight loss in % of mass is used to determine the organic/inorganic ratio of the different samples; C) FTIR spectra of the MNPs\_3%; MNPs\_1.5%; MNPs\_0.75%; MNPs\_0.37%; MNPs\_0.075%.

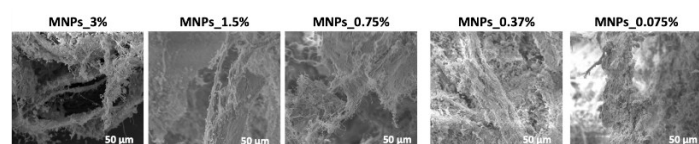

**Figure S7.** Scanning electron microscopy images of composites labeled with different amounts of MNPs (MNPs\_3%; MNPs\_1.5%; MNPs\_0.75%; MNPs\_0.37%; MNPs\_0.075%).

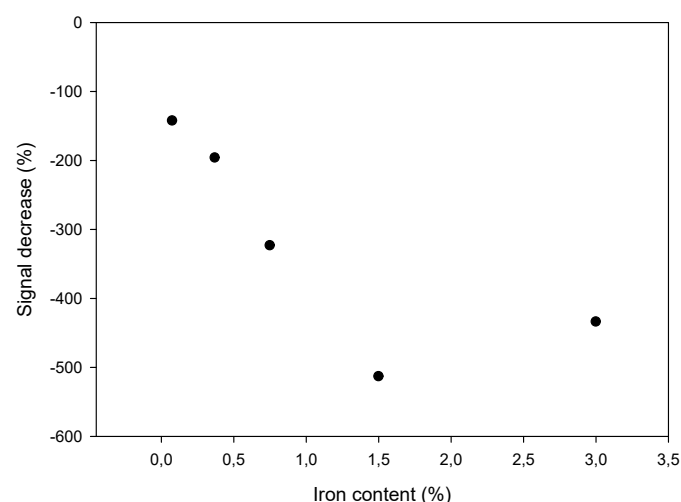

**Figure S8.** Decrease of the signal intensity (as expressed as the ratio between the signal of the magnetic matrix and the signal of the unlabelled scaffold) for the Hy(MNPs) scaffolds regarding to their iron content.

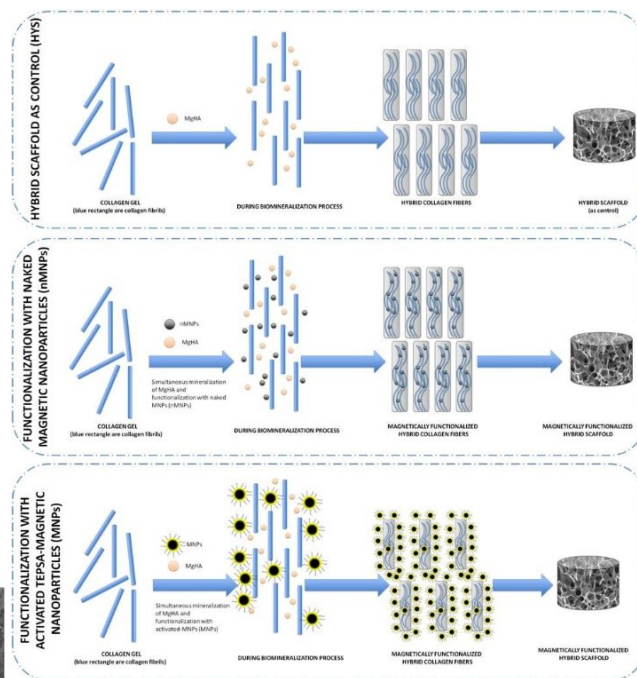

**Scheme S1.** Schematic illustration of a hypothesized mechanism about magnetic functionalization dependent on the presence of i) an activated shell (yellow ring) linking on the collagen surface (MNPs) or ii) naked nanoparticles (black core) being entrapped into collagen fibers during self-assembling of fibers (nMNPs).
