# Supplementary figures and images for: Magnetic and radio-labeled bio-hybrid scaffolds to promote and track in vivo the progress of bone regeneration
Source: Royal Society of Chemistry journal article supplement (doi:10.1039/d1bm00858g), 2021-01-01

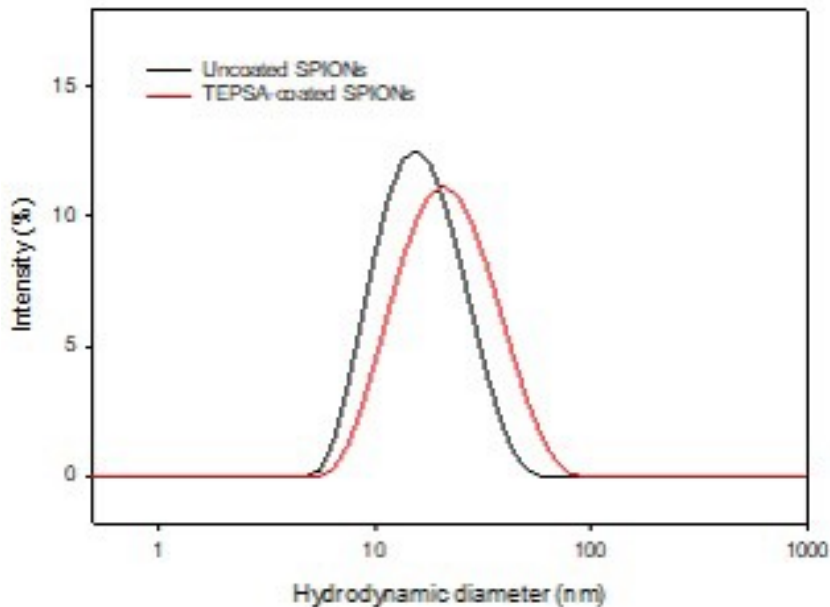

Supplement: d1bm00858g1.pdf [file d1bm00858g1.pdf]

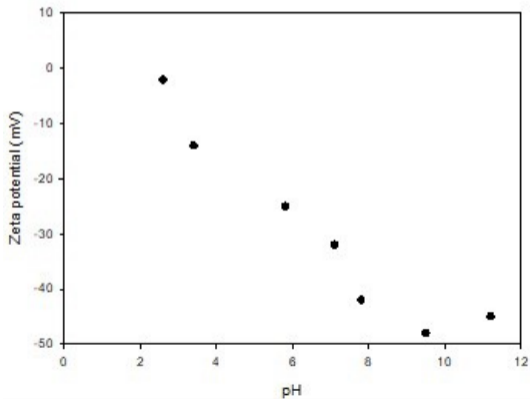

Supplement: d1bm00858g2.pdf [file d1bm00858g2.pdf]

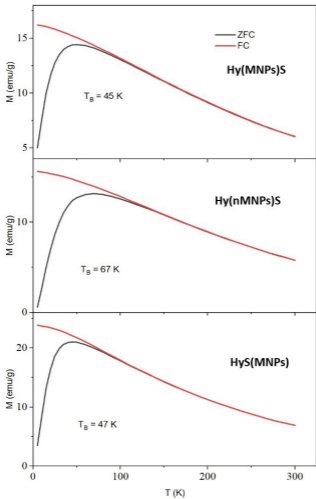

Supplement: d1bm00858g4.pdf [file d1bm00858g4.pdf]

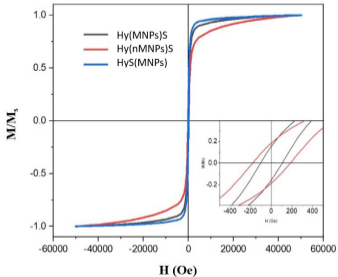

Supplement: d1bm00858g5.pdf [file d1bm00858g5.pdf]

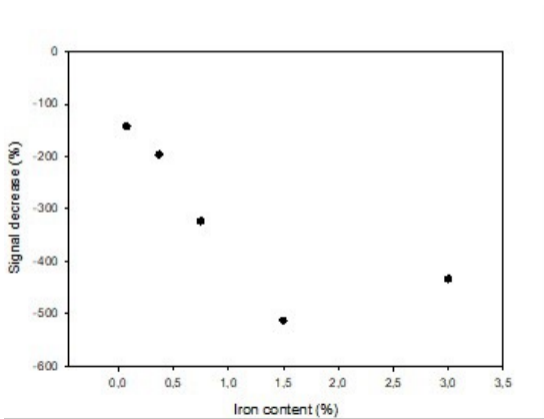

Supplement: d1bm00858g8.pdf [file d1bm00858g8.pdf]

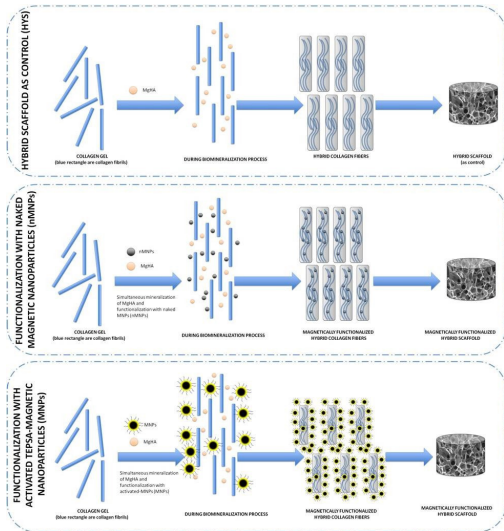

Supplement: d1bm00858g9.pdf [file d1bm00858g9.pdf]
